# Supplementary material
Source: publisher figshare collection journal article supplement (https://geolsoc.figshare.com/ndownloader/files/20044817)
Supplement: Supplementary file 1 [file 20044817]

## Sheet: Daling
Formatin	Sample_number	δ13C	δ18O
Zitai	AG-011	0.512	-9.645
Zitai	AG-010a	0.603	-9.663
Zitai	AG-10	0.77	-9.732
Zitai	AG-9	0.838	-9.576
Zitai	AG-8	0.811	-9.266
Zitai	AG-7	1.098	-9.249
Zitai	AG-6	1.028	-9.323
Zitai	AG-5	0.706	-8.959
Zitai	AG-4	1.009	-8.885
Zitai	AG-3	0.956	-8.956
Zitai	AG-2	0.882	-8.88
Zitai	12SC-120	0.49	-8.447
Zitai	12SC-121	0.308	-8.983
Zitai	12SC-124	0.211	-8.513
Zitai	12SC-125	0.231	-8.978
Zitai	12SC-126	0.12	-8.587
Hunghuayuan	12SC-127	0.146	-8.469
Hunghuayuan	12SC-128	0.097	-8.3
Hunghuayuan	12SC-128a	0.132	-7.317
Hunghuayuan	12SC-129	0.185	-7.735
Hunghuayuan	12SC-130	0.205	-7.647
Hunghuayuan	12SC-131	0.172	-8.865
Hunghuayuan	12SC-132	0.067	-8.826
Hunghuayuan	12SC-133	0.099	-8.718
Hunghuayuan	12SC-134	0.009	-8.673
Hunghuayuan	12SC-135	0.034	-9.123
Hunghuayuan	12SC-136	0.057	-9.274
Hunghuayuan	12SC-136a	-0.26	-9.219
Hunghuayuan	12SC-137a	0.465	-8.902
Hunghuayuan	12SC-138a	0.923	-7.792
Hunghuayuan	12SC-141	1.033	-8.418
Hunghuayuan	12SC-145	0.484	-9.701
Hunghuayuan	12SC-146	0.324	-9.46
Hunghuayuan	12SC-148	0.189	-9.039
Hunghuayuan	12SC-149	-0.292	-9.043
Hunghuayuan	12SC-150	-0.262	-8.522
Hunghuayuan	12SC-151	-0.262	-9.615
Hunghuayuan	12SC-152	-0.254	-9.25
Hunghuayuan	12SC-153	-0.546	-9.027
Hunghuayuan	12SC-154	-0.47	-9.893
Lunshan	12SC-155	-0.681	-9.653
Lunshan	12SC-156	-0.945	-9.645
Lunshan	12SC-159	-0.623	-8.663
Lunshan	12SC-162	-0.546	-8.269
Lunshan	12SC-164	0.066	-8.46
Lunshan	12SC-169	-0.853	-20.272
Lunshan	12SC-172	-0.513	-20.067
Lunshan	12SC-176	-0.688	-12.543
Lunshan	12SC-177	-0.379	-11.445
Lunshan	12SC-179	-0.119	-12.32
Lunshan	12SC-180	-0.209	-9.236
Lunshan	12SC-184	0.392	-17.835
Lunshan	12SC-186	0.852	-13.58
Lunshan	12SC-189	0.451	-19.443
Lunshan	12SC-192	0.423	-17.31
Lunshan	12SC-194	0.496	-18.792
Lunshan	12SC-196	1.443	-20.529
Lunshan	12SC-200	1.874	-13.348
Lunshan	12SC-203	0.755	-8.093
Lunshan	12SC-207	0.061	-12.575
Lunshan	12SC-208	-0.541	-13.51
Lunshan	12SC-209	0.285	-16.326
Lunshan	12SC-211	0.204	-14.027
Lunshan	12SC-214	0.734	-12.433
Lunshan	12SC-215	0.907	-14.516
Lunshan	12SC-216	1.193	-11.178
Lunshan	12SC-217	1.257	-11.01
Lunshan	12SC-218	0.644	-17.116
Lunshan	12SC-219	0.696	-17.663
Lunshan	12SC-221	0.586	-15.549
Lunshan	12SC-227	0.68	-16.006
Lunshan	12SC-230	-0.121	-19.206
Lunshan	12SC-233	-0.585	-11.403
Lunshan	12SC-237	-0.796	-10.075
Lunshan	12SC-239	-0.237	-10.383
Lunshan	12SC-242	-0.142	-9.038
Lunshan	12SC-245	-0.233	-10.308
Lunshan	12SC-246	-0.584	-10.343
Lunshan	12SC-248	-1.039	-10.393
Lunshan	12SC-249	-0.772	-10.801
Lunshan	12SC-251	0.488	-7.05
Lunshan	12SC-254	1.256	-15.488
Lunshan	12SC-257	1.298	-19.136
Lunshan	12SC-260	1.044	-17.486
Lunshan	12SC-263	1.094	-21.926
Lunshan	12SC-265	0.815	-21.282
Lunshan	12SC-266	1.207	-21.439
Lunshan	12SC-267	1.78	-14.644

## Sheet: Gudongkou
Formation	Sample_number	δ13C	δ18O
Nantsinkuan	17HXG-001	-1.364	-5.083
Nantsinkuan	17HXG-002	-1.392	-4.486
Nantsinkuan	17HXG-003	-1.687	-4.688
Nantsinkuan	17HXG-004	-1.571	-5.295
Nantsinkuan	17HXG-005	-1.162	-4.343
Nantsinkuan	17HXG-006	-1.132	-3.849
Nantsinkuan	17HXG-007	-1.874	-5.795
Nantsinkuan	17HXG-008	-1.723	-6.76
Nantsinkuan	17HXG-009	-1.599	-5.775
Nantsinkuan	17HXG-010	-1.899	-4.556
Nantsinkuan	17HXG-011	-1.587	-5.587
Nantsinkuan	17HXG-012	-1.491	-6.639
Nantsinkuan	17HXG-013	-1.575	-6.863
Nantsinkuan	17HXG-014	-1.872	-6.703
Nantsinkuan	17HXG-015	-3.083	-7.387
Nantsinkuan	17HXG-016	-2.231	-5.466
Nantsinkuan	17HXG-017	-2.196	-5.594
Nantsinkuan	17HXG-018	-2.147	-4.99
Nantsinkuan	17HXG-019	-1.808	-5.592
Nantsinkuan	17HXG-020	-2.036	-5.292
Nantsinkuan	17HXG-021	-1.429	-7.954
Nantsinkuan	17HXG-022	-1.931	-8.507
Nantsinkuan	17HXG-023	-2.745	-8.202
Nantsinkuan	17HXG-024	-2.429	-8.479
Nantsinkuan	17HXG-025	-2.369	-8.291
Nantsinkuan	17HXG-026	-1.744	-8.395
Nantsinkuan	17HXG-027	-2.358	-7.946
Nantsinkuan	17HXG-028	-2.331	-7.901
Nantsinkuan	17HXG-029	-2.408	-7.939
Nantsinkuan	17HXG-030	-2.349	-8.094
Nantsinkuan	17HXG-031	-2.483	-8.646
Nantsinkuan	17HXG-032	-2.128	-8.349
Nantsinkuan	17HXG-033	-2.044	-8.445
Nantsinkuan	17HXG-034	-1.475	-8.551
Nantsinkuan	17HXG-035	-0.63	-5.028
Nantsinkuan	17HXG-036	-0.678	-4.806
Nantsinkuan	17HXG-037	-0.742	-5.142
Nantsinkuan	17HXG-038	-1.383	-8.799
Nantsinkuan	17HXG-039	-1.272	-9.423
Nantsinkuan	17HXG-040	-2.286	-9.255
Nantsinkuan	17HXG-041	-2.074	-9.133
Nantsinkuan	17HXG-042	-1.435	-9.048
Nantsinkuan	17HXG-043	-0.47	-6.696
Nantsinkuan	17HXG-044	-1.144	-6.989
Nantsinkuan	17HXG-045	-1.428	-8.788
Nantsinkuan	17HXG-046	-1.25	-8.524
Nantsinkuan	17HXG-047	-1.355	-8.763
Nantsinkuan	17HXG-048	-1.045	-8.604
Nantsinkuan	17HXG-049	-1.139	-8.846
Nantsinkuan	17HXG-050	-1.273	-8.725
Nantsinkuan	17HXG-051	-1.307	-8.755
Nantsinkuan	17HXG-052	-1.124	-8.779
Nantsinkuan	17HXG-053	-1.365	-8.884
Nantsinkuan	17HXG-054	-1.137	-8.549
Nantsinkuan	17HXG-055	-1.427	-8.459
Nantsinkuan	17HXG-056	-1.326	-8.59
Nantsinkuan	17HXG-057	-1.531	-8.663
Nantsinkuan	17HXG-058	-1.104	-8.625
Nantsinkuan	17HXG-059	-1.146	-8.697
Nantsinkuan	17HXG-060	-1.224	-8.739
Nantsinkuan	17HXG-061	-1.145	-8.304
Nantsinkuan	17HXG-062	-1.137	-8.22
Nantsinkuan	17HXG-063	-1.086	-7.795
Nantsinkuan	17HXG-064	-1.124	-8.292
Nantsinkuan	17HXG-065	-0.925	-8.468
Nantsinkuan	17HXG-066	-0.975	-8.52
Fenhsiang	17HXG-067	-1.202	-8.024
Fenhsiang	17HXG-068	-0.898	-7.858
Fenhsiang	17HXG-069	-1.167	-8.282
Fenhsiang	17HXG-070	-1.151	-8.167
Fenhsiang	17HXG-071	-1.028	-8.43
Fenhsiang	17HXG-072	-1.25	-7.834
Fenhsiang	17HXG-073b	-1.261	-8.075
Fenhsiang	17HXG-074	-0.938	-8.148
Fenhsiang	17HXG-075	-0.699	-7.911
Fenhsiang	17HXG-076	-0.845	-7.996
Fenhsiang	17HXG-077	-0.621	-7.808
Fenhsiang	17HXG-078	-0.977	-7.911
Fenhsiang	17HXG-079	-1.758	-7.663
Fenhsiang	17HXG-080	-1.778	-8.016
Fenhsiang	17HXG-081	-0.926	-6.917
Fenhsiang	17HXG-082	-0.929	-8.031
Fenhsiang	17HXG-083	-0.624	-8.055
Fenhsiang	17HXG-084	-0.828	-8.016
Fenhsiang	17HXG-085	-1.269	-8.356
Fenhsiang	17HXG-086	-1.426	-8.874
Fenhsiang	17HXG-087	-1.411	-7.686
Fenhsiang	17HXG-088	-1.487	-8.341
Fenhsiang	17HXG-089	-1.57	-8.137
Fenhsiang	17HXG-090	-1.142	-8.619
Fenhsiang	17HXG-091	-2.309	-8.471
Fenhsiang	17HXG-092	-1.742	-8.395
Fenhsiang	17HXG-093	-1.697	-8.415
Fenhsiang	17HXG-094	-2.535	-8.223
Fenhsiang	17HXG-095	-2.05	-7.995
Fenhsiang	17HXG-096	-2.659	-8.212
Fenhsiang	17HXG-097	-2.624	-8.212
Fenhsiang	17HXG-098	-2.162	-8.632
Fenhsiang	17HXG-099	-1.776	-8.559
Fenhsiang	17HXG-100	-2.453	-8.846
Fenhsiang	17HXG-101	-2.163	-8.269
Fenhsiang	17HXG-102	-2.096	-8.811
Fenhsiang	17HXG-103	-2.283	-8.418
Fenhsiang	17HXG-104	-2.148	-8.761
Fenhsiang	17HXG-105	-1.932	-8.403
Fenhsiang	17HXG-106	-1.789	-8.562
Fenhsiang	17HXG-107	-1.708	-8.099
Fenhsiang	17HXG-108	-1.773	-8.334
Fenhsiang	17HXG-109	-1.937	-8.048
Fenhsiang	17HXG-110	-1.961	-8.82
Fenhsiang	17HXG-111	-1.962	-8.688
Fenhsiang	17HXG-112	-1.771	-8.714
Fenhsiang	17HXG-113	-1.729	-8.256
Fenhsiang	17HXG-114	-1.632	-8.49
Fenhsiang	17HXG-115	-1.48	-8.468
Fenhsiang	17HXG-116	-1.709	-8.311
Fenhsiang	17HXG-117	-1.759	-8.406
Fenhsiang	17HXG-118	-1.819	-8.386
Fenhsiang	17HXG-119	-2.275	-8.142
Hunghuayuan	17HXG-120	-1.903	-7.383
Hunghuayuan	17HXG-121	-1.767	-8.357
Hunghuayuan	17HXG-122	-1.842	-8.36
Hunghuayuan	17HXG-123	-1.714	-8.405
Hunghuayuan	17HXG-124	-1.687	-8.451
Hunghuayuan	17HXG-125	-0.715	-5.801
Hunghuayuan	17HXG-126	-1.639	-8.295
Hunghuayuan	17HXG-127	-1.572	-7.682
Hunghuayuan	17HXG-128	-1.24	-8.081
Hunghuayuan	17HXG-129	-0.893	-7.986
Hunghuayuan	17HXG-130	-1.018	-7.997
Hunghuayuan	17HXG-131	-0.751	-7.88
Hunghuayuan	17HXG-132	-0.738	-7.63
Hunghuayuan	17HXG-133	-0.786	-7.827
Hunghuayuan	17HXG-134	-0.461	-8.072
Hunghuayuan	17HXG-135	-1.084	-8.236
Hunghuayuan	17HXG-136	-0.901	-7.791
Hunghuayuan	17HXG-137	-1.54	-8.116
Hunghuayuan	17HXG-138	-1.592	-8.213
Hunghuayuan	17HXG-139	-1.473	-8.222
Hunghuayuan	17HXG-140	-1.417	-8.26
Hunghuayuan	17HXG-141	-1.405	-8.285
Hunghuayuan	17HXG-142	-1.781	-8.367
Hunghuayuan	17HXG-143	-1.743	-8.288
Hunghuayuan	17HXG-144	-1.792	-8.259
Hunghuayuan	17HXG-145	-1.597	-8.426
Hunghuayuan	17HXG-146	-1.495	-8.304
Hunghuayuan	17HXG-147	-1.535	-8.361
Hunghuayuan	17HXG-148	-1.321	-8.398
Hunghuayuan	17HXG-149	-1.606	-8.454
Hunghuayuan	17HXG-150	-1.607	-8.461
Hunghuayuan	17HXG-151b	-1.627	-8.191
Hunghuayuan	17HXG-152	-1.776	-7.938
Hunghuayuan	17HXG-153	-1.658	-7.898
Hunghuayuan	17HXG-154	-1.654	-8.282
Hunghuayuan	17HXG-155	-1.819	-8.082
Hunghuayuan	17HXG-156	-2.27	-8.4
Hunghuayuan	17HXG-157	-1.88	-8.414
Hunghuayuan	17HXG-158	-0.871	-8.105
Hunghuayuan	17HXG-159	-0.876	-7.976
Hunghuayuan	17HXG-160	0.277	-5.799
Hunghuayuan	17HXG-161	-0.46	-7.57
Hunghuayuan	17HXG-162	0	-6.973
Dawan	17HXG-163	-0.177	-6.88
Dawan	17HXG-164	-0.161	-7.59
Dawan	17HXG-165	-0.287	-8.373
Dawan	17HXG-166	-0.319	-8.004
Dawan	17HXG-167	-0.01	-6.059
Dawan	17HXG-168	-0.17	-7.329
Dawan	17HXG-169	0.02	-7.513
Dawan	17HXG-170	0.047	-7.559
Dawan	17HXG-171	0.004	-6.656
Dawan	17HXG-172	0.043	-7.746
Dawan	17HXG-173	-0.077	-8.131
Dawan	17HXG-174	-0.126	-7.957
Dawan	17HXG-175	0.083	-8.215
Dawan	17HXG-176	-0.166	-7.922
Dawan	17HXG-177	-0.305	-7.911
Dawan	17HXG-178	0.133	-7.117
Dawan	17HXG-179	-0.232	-7.667
Dawan	17HXG-180	0.103	-8.014
Dawan	17HXG-181	0.129	-7.745
Dawan	17HXG-182	-0.556	-7.892
Dawan	17HXG-183	0.204	-7.673
Dawan	17HXG-184	-0.053	-7.695
Dawan	17HXG-185	0.064	-6.826
Dawan	17HXG-186	-0.985	-7.972
Dawan	17HXG-187	-0.734	-7.589
Dawan	17HXG-188	-0.06	-7.755
Dawan	17HXG-189	0.03	-8.2
Dawan	17HXG-190	0.153	-8.29
Dawan	17HXG-191	-0.281	-8.362
Dawan	17HXG-192	-0.153	-8.22
Dawan	17HXG-193	-0.181	-7.911
Dawan	17HXG-194	-0.693	-7.541
Dawan	17HXG-195	-0.814	-7.828
Dawan	17HXG-196	0.066	-7.52
Dawan	17HXG-197	-0.23	-8.081
Dawan	17HXG-198	0.149	-6.871
Dawan	17HXG-199	-0.002	-8.016
Dawan	17HXG-200	0.066	-8.015
Dawan	17HXG-201	-0.297	-7.611
Dawan	17HXG-202	-0.209	-7.942
Dawan	17HXG-203	0.087	-7.982
Dawan	17HXG-204	-0.074	-8.023
Dawan	17HXG-205	-0.007	-8.057
Dawan	17HXG-206	-0.177	-7.371
Dawan	17HXG-207	-0.426	-7.833
Dawan	17HXG-208	-0.236	-8.038
Dawan	17HXG-209	-0.825	-8.034
Dawan	17HXG-210	-0.555	-7.155
Dawan	17HXG-211	-0.797	-7.922
Dawan	17HXG-212	-0.494	-6.974
Dawan	17HXG-213	-0.781	-7.596
Dawan	17HXG-214	-0.612	-7.068
Dawan	17HXG-215	-0.052	-6.546
Dawan	17HXG-216	-0.518	-7.529
Dawan	17HXG-217	-0.598	-7.838
Dawan	17HXG-218	-0.633	-7.389
Dawan	17HXG-219	-0.05	-6.858
Dawan	17HXG-220	-0.141	-7.431
Dawan	17HXG-221	-0.12	-7.57
Dawan	17HXG-222	-0.043	-7.217
Dawan	17HXG-223	-0.323	-7.963
Dawan	17HXG-224	0.174	-7.219
Dawan	17HXG-225	-0.175	-7.778
Dawan	17HXG-226	-0.095	-7.696
Dawan	17HXG-227	-0.039	-7.367
Dawan	17HXG-228	-0.112	-7.571
Dawan	17HXG-229	0.181	-7.413
Dawan	17HXG-230	0.24	-7.406
Dawan	17HXG-231	0.298	-7.043

## Sheet: Xiangshuidong
Formation	Sample no.	δ13C	δ18O
Nantsinkuan	AGO-102	0.322	-8.848
Nantsinkuan	AGO-103	0.203	-9.501
Nantsinkuan	AGO-106	-0.155	-8.68
Nantsinkuan	AGO-109	-0.314	-8.938
Nantsinkuan	AGO-110	-0.307	-8.002
Nantsinkuan	AGO-111	0	-7.398
Nantsinkuan	AGO-113	0.896	-7.964
Nantsinkuan	AGO-115	1.77	-8.671
Nantsinkuan	AGO-120	0.862	-8.229
Nantsinkuan	AGO-130	0.032	-7.545
Nantsinkuan	AGO-130c	-0.029	-8.335
Nantsinkuan	AGO-132	-0.145	-8.501
Nantsinkuan	AGO-135	-0.222	-8.349
Nantsinkuan	AGO-136	-0.421	-8.718
Nantsinkuan	AGO-138	-0.328	-8.183
Nantsinkuan	AGO-140	-0.416	-8.784
Nantsinkuan	AGO-141	-0.597	-8.915
Nantsinkuan	AGO-142	-0.891	-8.34
Nantsinkuan	AGO-143	-0.593	-7.952
Nantsinkuan	AGO-144	-0.643	-8.366
Nantsinkuan	AGO-145	-0.422	-7.938
Nantsinkuan	AGO-148	-0.636	-7.667
Nantsinkuan	AGO-152	-0.458	-8.329
Nantsinkuan	AGO-156	-0.625	-8.036
Nantsinkuan	AGO-159	-1.069	-7.36
Nantsinkuan	AGO-160	-1.136	-8.219
Nantsinkuan	AGO-162	-0.958	-8.22
Nantsinkuan	AGO-164	-0.924	-6.754
Nantsinkuan	AGO-167	-1.189	-7.679
Nantsinkuan	AGO-168	-1.442	-8.751
Nantsinkuan	AGO-169	-1.058	-8.557
Nantsinkuan	AGO-170	-1.141	-8.072
Nantsinkuan	AGO-171	-1.272	-9.006
Nantsinkuan	AGO-172	-1.002	-8.294
Nantsinkuan	AGO-173	-0.986	-8.699
Nantsinkuan	AGO-174	-0.997	-8.668
Nantsinkuan	AGO-175	-0.984	-8.443
Nantsinkuan	AGO-176	-0.99	-8.332
Nantsinkuan	AGO-177	-1.018	-8.213
Nantsinkuan	AGO-179	-0.97	-8.427
Nantsinkuan	AGO-181	-1.586	-9.07
Nantsinkuan	AGO-184	-1.073	-8.287
Nantsinkuan	AGO-185	-1.211	-8.273
Nantsinkuan	AGO-186	-1.122	-8.224
Nantsinkuan	AGO-187	-1.333	-7.657
Nantsinkuan	AGO-188	-0.893	-7.867
Nantsinkuan	AGO-189	-1.09	-7.928
Nantsinkuan	AGO-190	-1.215	-7.882
Nantsinkuan	AGO-191	-1.053	-8.102
Nantsinkuan	AGO-193	-1.354	-9.087
Nantsinkuan	AGO-194	-1.213	-8.801
Nantsinkuan	AGO-195	-1.43	-7.974
Nantsinkuan	AGO-197	-1.011	-8.815
Nantsinkuan	AGO-198	-1.035	-8.422
Nantsinkuan	AGO-199	-1.212	-8.079
Nantsinkuan	AGO-202	-0.899	-8.013
Nantsinkuan	AGO-203	-1.086	-8.527
Nantsinkuan	AGO-204	-0.993	-8.547
Nantsinkuan	AGO-205	-0.983	-8.149
Nantsinkuan	AGO-206	-0.662	-8.041
Nantsinkuan	AGO-207	-0.363	-8.098
Nantsinkuan	AGO-208	-0.554	-8.003
Nantsinkuan	AGO-209	-0.852	-8.365
Nantsinkuan	AGO-210	-1.394	-7.745
Nantsinkuan	AGO-211	-0.927	-7.691
Nantsinkuan	AGO-212	-0.725	-7.525
Nantsinkuan	AGO-213	-0.783	-7.568
Nantsinkuan	AGO-214	-0.834	-7.891
Nantsinkuan	AGO-215	-1.083	-8.22
Nantsinkuan	AGO-217	-0.793	-7.238
Fenhsiang	AGO-219	-0.717	-7.862
Fenhsiang	AGO-220	-0.591	-7.725
Fenhsiang	AGO-224	-0.713	-7.968
Fenhsiang	AGO-226	-0.51	-7.756
Fenhsiang	AGO-228	-0.659	-7.553
Fenhsiang	AGO-229	-1.05	-8.07
Fenhsiang	AGO-232	-1.305	-8.679
Fenhsiang	AGO-234	-0.685	-7.954
Fenhsiang	AGO-236	-0.673	-7.934
Fenhsiang	AGO-238	-0.121	-8.552
Fenhsiang	AGO-239	0.055	-8.516
Fenhsiang	AGO-240	0.154	-8.105
Fenhsiang	AGO-241	0.639	-6.843
Fenhsiang	AGO-242	0.819	-7.798
Fenhsiang	AGO-243	0.74	-7.788
Fenhsiang	AGO-244	0.638	-7.953
Fenhsiang	AGO-245	0.282	-7.645
Fenhsiang	AGO-246	0.99	-6.535
Fenhsiang	AGO-247	-0.857	-9.164
Fenhsiang	AGO-249	-0.479	-7.501
Fenhsiang	AGO-250	-0.917	-7.711
Fenhsiang	AGO-251	-0.697	-7.794
Fenhsiang	AGO-253	-0.669	-7.698
Fenhsiang	AGO-254	-0.725	-7.976
Fenhsiang	AGO-260	-0.535	-7.586
Fenhsiang	AGO-261	-0.426	-7.166
Fenhsiang	AGO-262	-0.906	-7.529
Fenhsiang	AGO-263	-0.484	-7.382
Fenhsiang	AGO-264	-0.267	-7.377
Fenhsiang	AGO-265	-0.291	-7.985
Fenhsiang	AGO-266	-0.898	-7.368
Fenhsiang	235.5m	0.133	-8.293
Fenhsiang	245m	-0.114	-8.889
Fenhsiang	246m	0.58	-8.547
Fenhsiang	247m	0.169	-7.703
Fenhsiang	248m	-0.677	-7.939
Fenhsiang	249m	-1.559	-8.141
Fenhsiang	250m	-0.931	-8.287
Fenhsiang	251m	-1.125	-8.164
Fenhsiang	253m	-0.944	-8.206
Fenhsiang	253m-2	0.256	-8.714
Fenhsiang	254m	0.446	-8.023
Fenhsiang	255m	0.823	-7.177
Fenhsiang	258m	-0.369	-8.066
Fenhsiang	260.5m	-0.724	-7.6
Fenhsiang	262m	-0.922	-7.276
Fenhsiang	267m	-0.36	-8.336
Fenhsiang	268.2m	-0.986	-7.644
Fenhsiang	274m	-1.159	-7.812
Fenhsiang	275m	-1.168	-7.973
Fenhsiang	276.5m	-2.173	-8.32
Fenhsiang	278m	-3.149	-9.403
Fenhsiang	281.5m	-2.72	-9.364
Fenhsiang	284m	-2.404	-8.356
Fenhsiang	287m	-2.988	-8.619
Fenhsiang	289m	-2.836	-8.429
Fenhsiang	290.8m	-2.589	-7.917
Fenhsiang	306m	-1.232	-9.03
Fenhsiang	308m	-1.259	-8.413
Fenhsiang	311m	-1.043	-8.727
Hunghuayuan	312m	-1.155	-7.889
Hunghuayuan	313m	-3.619	-8.104
Hunghuayuan	313.5m	-1.106	-7.76
Hunghuayuan	314.5m	-1.382	-8.443
Hunghuayuan	316m	-2.328	-9.67
Hunghuayuan	317m	-0.66	-8.538
Hunghuayuan	318m	-1.511	-8.804
Hunghuayuan	319m	-1.462	-8.472
Hunghuayuan	320.4m	-1.044	-8.381
Hunghuayuan	322m	-1.303	-8.33
Hunghuayuan	323m	-1.088	-8.188
Hunghuayuan	324.2m	-1.892	-8.516
Hunghuayuan	325.2m	-1.633	-8.333
Hunghuayuan	330m	-0.98	-7.763
Hunghuayuan	330.5m	-0.906	-7.991
Hunghuayuan	331m	-0.818	-7.268
Hunghuayuan	331.5m	-0.864	-7.983
Hunghuayuan	332m	-0.816	-7.556
Hunghuayuan	333m	-0.801	-7.651
Hunghuayuan	334m	-1.05	-8.18
Hunghuayuan	335m	-0.536	-7.073
Hunghuayuan	337.5m	-0.568	-7.936
Hunghuayuan	337m	-1.126	-8.134
Hunghuayuan	338.2m	-0.695	-7.923
Hunghuayuan	339.2m	-0.596	-7.198
Hunghuayuan	339.8m	-0.669	-7.732
Hunghuayuan	340.6m	-0.605	-8.393
Hunghuayuan	341.2m	-0.888	-8.765
Hunghuayuan	342m	-0.437	-7.189
Hunghuayuan	342.5m	-0.208	-8.464
Hunghuayuan	343m	-0.211	-7.761
Hunghuayuan	344m	-0.485	-7.998
Hunghuayuan	345m	-0.681	-7.715
Hunghuayuan	347.3m	-0.47	-7.832
Hunghuayuan	347.8m	-0.779	-8.137
Zitai	348.5m	-0.598	-7.614
Zitai	349m	-0.523	-7.982
Zitai	349.5m	-0.903	-8.292
Zitai	350m	-0.444	-8.367
Zitai	351m	-0.298	-7.923
Zitai	352m	-0.167	-7.476
Zitai	353m	0.042	-7.823
Zitai	355.2m	0.352	-8.09
Zitai	356m	-0.115	-8.24
Zitai	357m	0.47	-7.719
Zitai	358m	0.324	-9.429
Zitai	359m	0.794	-7.609
Zitai	360m	0.651	-8.336
Zitai	364m	0.549	-8.163
Zitai	364.5m	0.692	-8.42
Zitai	369m	1.006	-7.982
Zitai	379m	0.676	-8.698
Zitai	383m	-0.514	-8.006
Zitai	385m	-0.624	-7.999
Zitai	387m	-0.171	-6.672
Zitai	391m	0.575	-7.803
Zitai	392m	-1.173	-8.808
Zitai	394m	0.602	-7.078
Zitai	395m	0.557	-6.648
Zitai	396m	0.748	-8.049
Zitai	397.8m	0.846	-8.136
Zitai	399m	0.686	-8.645
Zitai	400m	0.5	-8.81
Zitai	404.7m	0.478	-8.556
Zitai	408m	0.618	-8.643
Zitai	416m	0.248	-8.95
Zitai	418m	0.429	-8.259
Zitai	421m	0.631	-8.989
Zitai	424m	0.503	-8.196
Zitai	428m	0.374	-8.891
Zitai	431.5m	0.336	-8.733
Zitai	432.5m	0.383	-8.552
Zitai	433.5m	0.422	-8.705
Zitai	436m	0.208	-8.309
Zitai	438.5m	-0.016	-7.771
Zitai	440.5m	-0.059	-7.794
Zitai	442.5m	-0.083	-8.32
Zitai	444m	0.024	-7.585
Zitai	446m	-0.546	-7.972
Zitai	449m	-2.178	-8.072
Zitai	450.5m	0.186	-8.213
Zitai	452.5m	0.124	-8.327
Zitai	454m	0.447	-8.668
Zitai	456m	-0.223	-8.514
Zitai	461m	0.529	-8.495
Zitai	463m	0.537	-8.829
Zitai	464m	0.596	-8.731
Kuniutan	464.5m	0.622	-8.706
Kuniutan	465m	0.518	-8.419
Kuniutan	466m	0.787	-8.621
Kuniutan	466.3m	0.753	-8.673
Kuniutan	467m	0.635	-8.688
Kuniutan	467.5m	0.709	-8.655
